# Supplementary material for: Modulating a 2D heterointerface with g-C3N4 mesh layers: a suitable hetero-layered architecture for high-power and long-life energy storage
Source: Royal Society of Chemistry journal article supplement (doi:10.1039/d0ta12497d), 2021-01-01
Supplement: d0ta12497d1.pdf [file d0ta12497d1.pdf]

## Supporting Information for

### **Modulating 2D Heterointerface with g-C<sub>3</sub>N<sub>4</sub> Meshes: A Suitable Hetero-Layered Architecture for High-Power and Long-Life Energy Storage**

*Yunping Wu, Wei Wei\*, Tianyi Ding, Sheng Chen, Rui Zhai and Caihe Bai*

*Department of Applied Chemistry, School of Chemistry, Xi'an Key Laboratory of Sustainable Energy Material Chemistry, Xi'an Jiaotong University, Xi'an 710049, PR China.*

**\*E-mail:** [wwei.mc@mail.xjtu.edu.cn](mailto:wwei.mc@mail.xjtu.edu.cn)

**ORCID:** 0000-0002-8357-8427

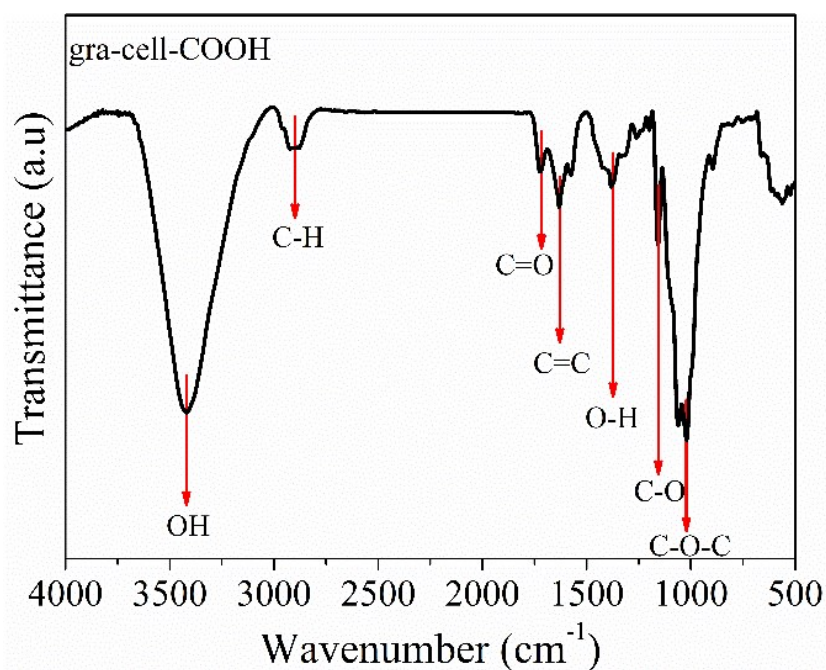

**Figure S1** FTIR spectrum of gra-cell-COOH. The absorbance peaks at 1021, 1167, 1387, 2900 and 3435  $\text{cm}^{-1}$  stem from celluloses, corresponding to the C–O–C pyranose ring skeletal vibration, C–O antisymmetric stretching vibration in ester, O–H deformation, H–O–H bending of the absorbed water, aliphatic C–H stretching vibrations and stretching of –OH, respectively.

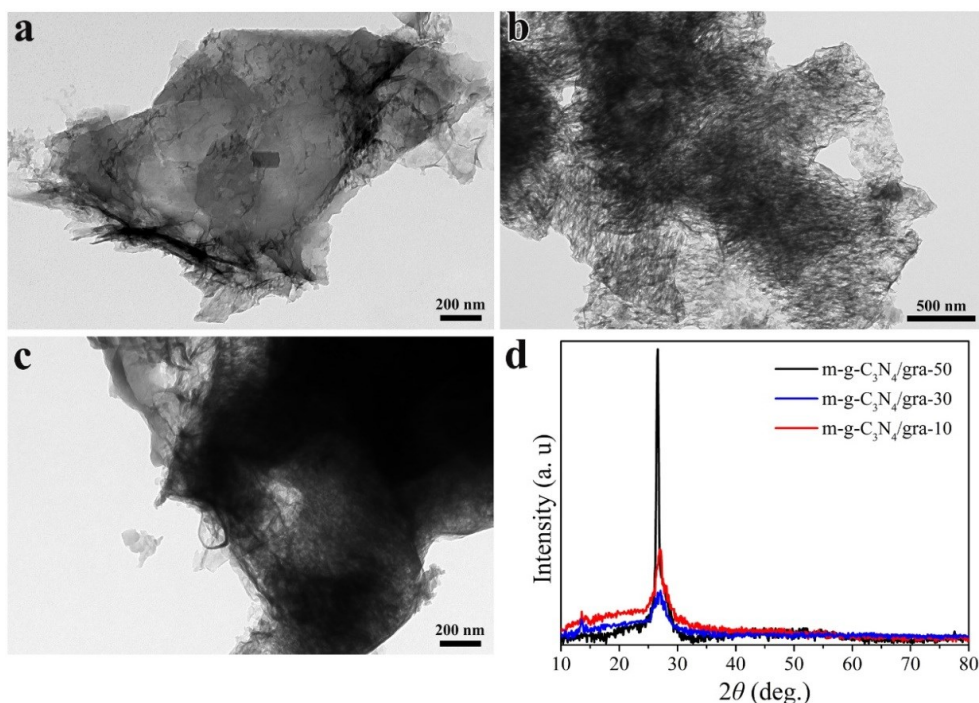

**Figure S2** TEM images of (a) m-g-C<sub>3</sub>N<sub>4</sub>/gra-50, (b) m-g-C<sub>3</sub>N<sub>4</sub>-30 and (c) m-g-C<sub>3</sub>N<sub>4</sub>-10; (d) XRD patterns of m-g-C<sub>3</sub>N<sub>4</sub>/gra-50, m-g-C<sub>3</sub>N<sub>4</sub>-30 and m-g-C<sub>3</sub>N<sub>4</sub>-10.

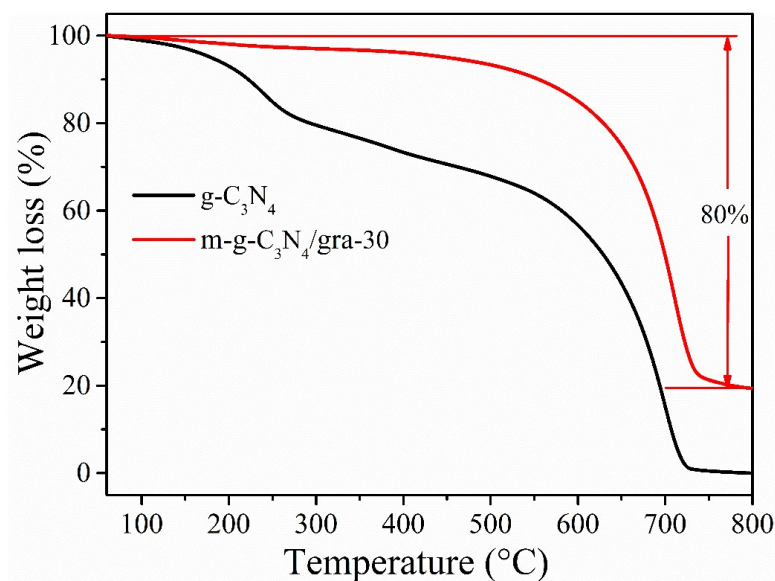

**Figure S3** TG curves of g-C<sub>3</sub>N<sub>4</sub> and m-g-C<sub>3</sub>N<sub>4</sub>/gra-30 samples tested under N<sub>2</sub> atmosphere. The g-C<sub>3</sub>N<sub>4</sub> decomposed completely at temperatures up to 800 °C while the weight of graphene kept constant under the same condition<sup>1</sup>. The residual mass ratio in the m-g-C<sub>3</sub>N<sub>4</sub>/gra-30 composites at 800°C is related to the weight ratio of graphene in the composites. Hence, the weight ratio of graphene in m-g-C<sub>3</sub>N<sub>4</sub>/gra-30 composites is ~20%.

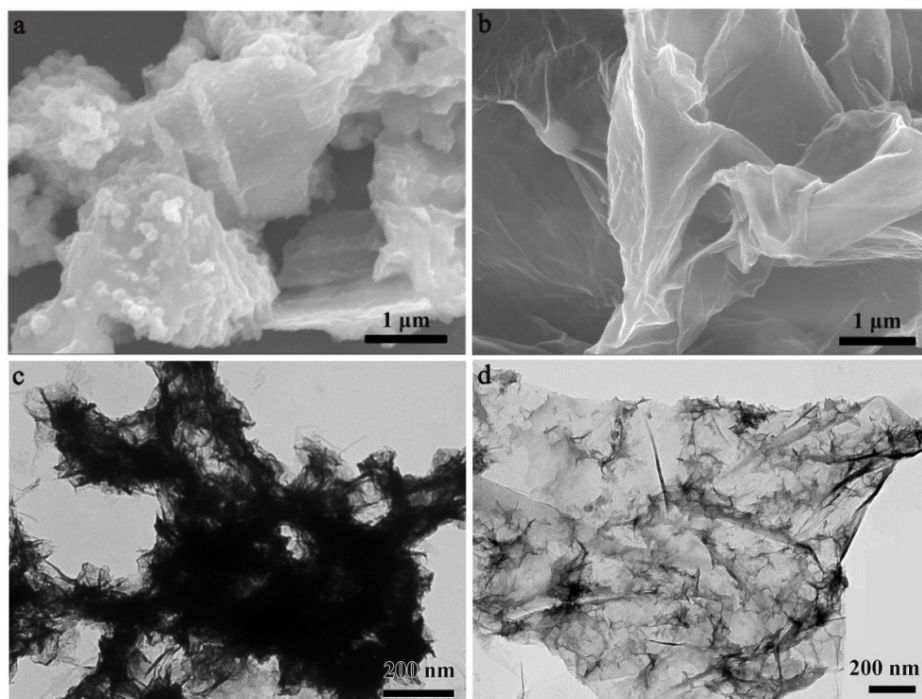

**Figure S4** SEM images of (a) pure NiS<sub>2</sub> and (b) NiS<sub>2</sub>/gra, TEM image of (c) pure NiS<sub>2</sub> and (d) NiS<sub>2</sub>/gra.

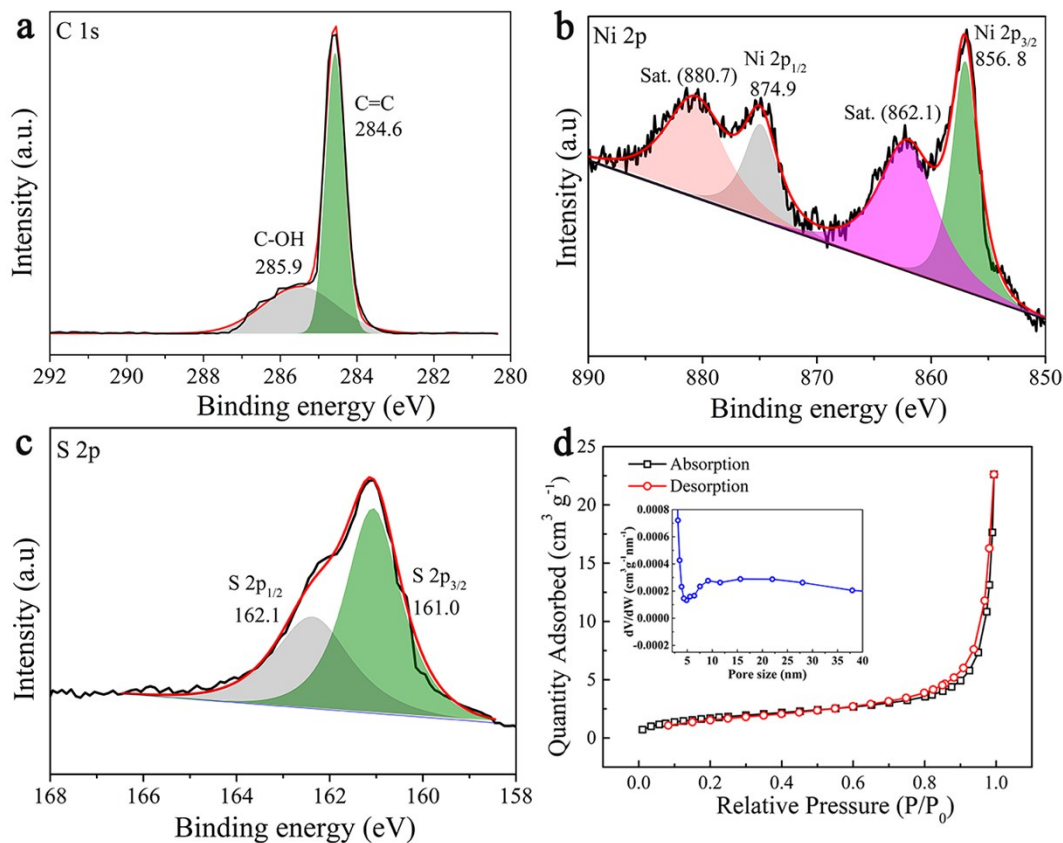

**Fig**

**ure S5** XPS spectra of C 1s (a), Ni 2p (b) and S 2p (c) in NiS<sub>2</sub>/gra, N<sub>2</sub> adsorption-desorption isotherms (d) of NiS<sub>2</sub>/gra (inset: pore-size distribution).

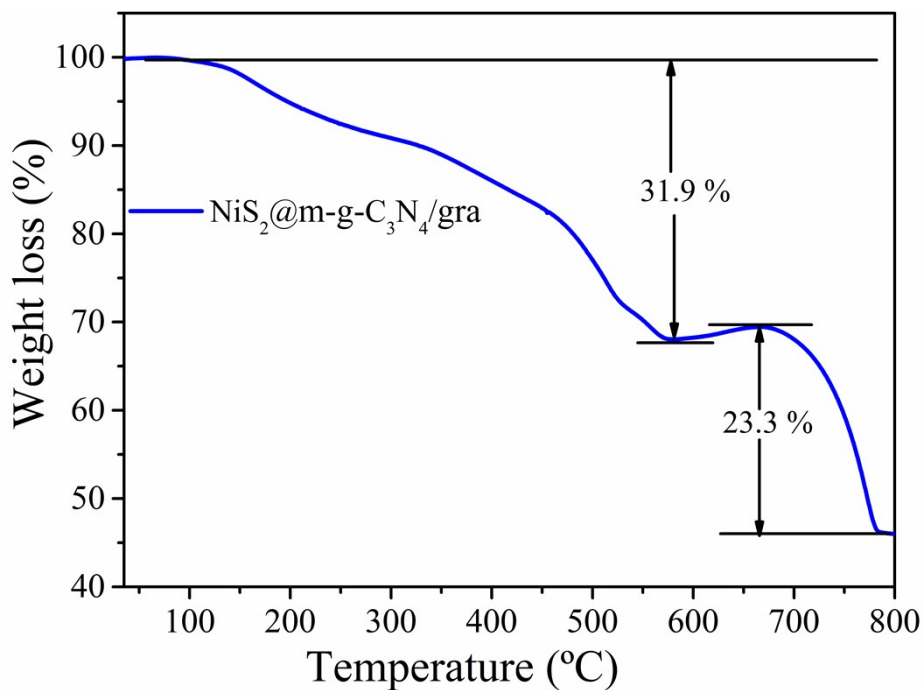

**Figure S6** TG curve of NiS<sub>2</sub>@m-g-C<sub>3</sub>N<sub>4</sub>/gra tested under air condition.

To evaluate the content of NiS<sub>2</sub> component in the NiS<sub>2</sub>@m-g-C<sub>3</sub>N<sub>4</sub>/gra, TG analysis is carried out in air atmosphere. A major weight loss of 31.9 wt.% below 580 °C is due to the burning of m-g-C<sub>3</sub>N<sub>4</sub>/gra and decomposition of NiS<sub>2</sub> to NiS<sup>2</sup>. Subsequently, the weight was faintly increased within the temperature range from 580 °C to 680 °C stage, which might be ascribed to the transformation of NiS to NiSO<sub>4</sub><sup>3</sup>. The final mass loss of 23.3 wt.% within the range of 680-780 °C could be ascribed to the decomposition of NiSO<sub>4</sub> to NiO. Based on these results, the reactions of NiS<sub>2</sub> and O<sub>2</sub> during calcination can be proposed as following:

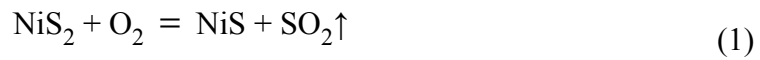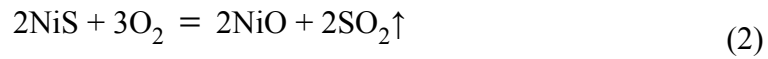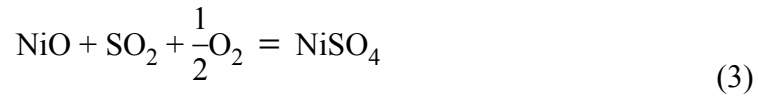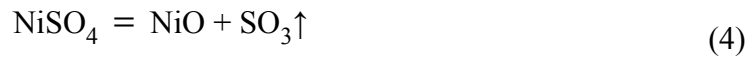

Therefore, the content of NiS<sub>2</sub> component can be calculated from the residual mass after heating the NiS<sub>2</sub>@m-g-C<sub>3</sub>N<sub>4</sub>/gra composites above 780°C, which is close to 75.7 wt.%.

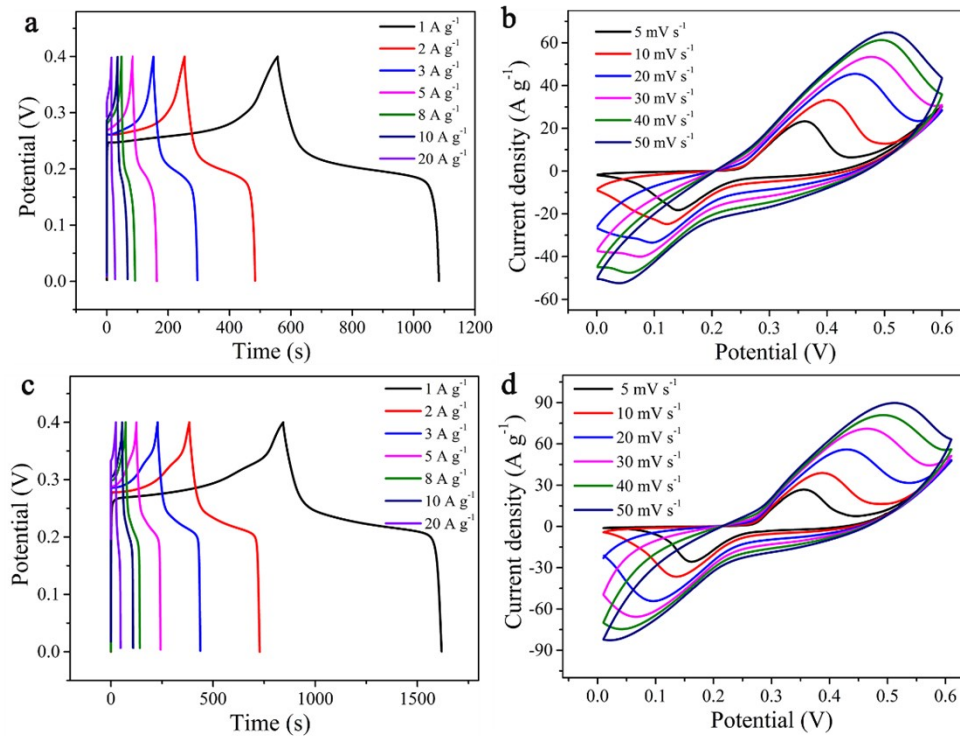

**Figure S7** GCD curves of (a) pure NiS<sub>2</sub> and (c) NiS<sub>2</sub>/gra electrode; CV curves of (b) pure NiS<sub>2</sub> and (d) NiS<sub>2</sub>/gra electrode.

and (d) NiS<sub>2</sub>/gra electrode.

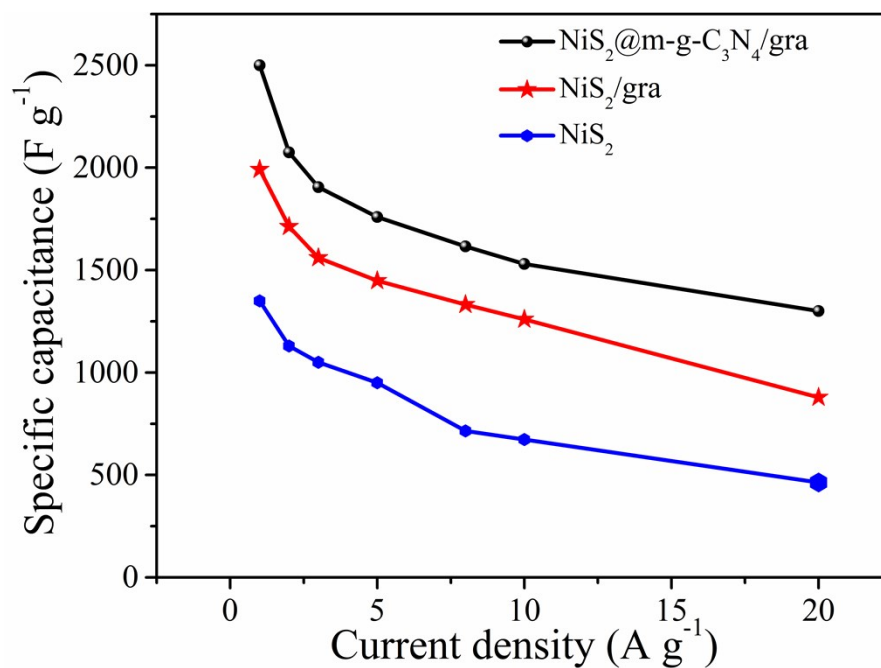

**Figure S8** Comparison of specific capacitance of three electrodes at current densities from 1 to 20 A g<sup>-1</sup>.

**Table S1** The specific capacity/capacitance of the NiS<sub>2</sub>, NiS<sub>2</sub>/gra and NiS<sub>2</sub>@m-g-C<sub>3</sub>N<sub>4</sub>/gra electrodes at various current densities (A g<sup>-1</sup>).

| Current density (A g <sup>-1</sup> ) | Specific capacity (mAh g <sup>-1</sup> ) / capacitance (F g <sup>-1</sup> ) |                       |                  |
|--------------------------------------|-----------------------------------------------------------------------------|-----------------------|------------------|
|                                      | NiS <sub>2</sub> @m-g-C <sub>3</sub> N <sub>4</sub> /gra                    | NiS <sub>2</sub> /gra | NiS <sub>2</sub> |
| 1                                    | 296 / 2500                                                                  | 234 / 1991            | 154 / 1350       |
| 2                                    | 244 / 2075                                                                  | 208 / 1712            | 132 / 1130       |
| 3                                    | 234 / 1905                                                                  | 190 / 1560            | 121 / 1050       |
| 5                                    | 200 / 1759                                                                  | 175 / 1448            | 105 / 950        |
| 8                                    | 176 / 1616                                                                  | 159 / 1332            | 86 / 715         |
| 10                                   | 164 / 1530                                                                  | 149 / 1260            | 78 / 673         |
| 20                                   | 150 / 1300                                                                  | 112 / 878             | 45 / 463         |

**Table S2** Comparison of electrochemical performance of recently reported TMDs/graphene heterostructured electrodes for SC applications.

| Electrode                                                | Specific capacitance/capacity                                          | Electrolyte | Ref.      |
|----------------------------------------------------------|------------------------------------------------------------------------|-------------|-----------|
| $\alpha$ -NiS/rGO                                        | 744 C g <sup>-1</sup> (1 A g <sup>-1</sup> )                           | 2 M KOH     | 4         |
| ANM-NiS-rGO                                              | 150 mAh g <sup>-1</sup> (1 A g <sup>-1</sup> )                         | 3 M KOH     | 5         |
| VS <sub>4</sub> /rGO/CoS <sub>2</sub> @Co                | 274.3 mAh g <sup>-1</sup> (0.625 A g <sup>-1</sup> )                   | 2 M KOH     | 6         |
| 0.5 cP/rGO/Co <sub>9</sub> S <sub>8</sub>                | 788.9 (1 A g <sup>-1</sup> )                                           | 2M KOH      | 7         |
| Ni <sub>3</sub> S <sub>4</sub> @rGO-20                   | 1830 (2 A g <sup>-1</sup> )                                            | 2 M KOH     | 8         |
| MoS <sub>2</sub> /3D graphene                            | 102.46 (0.5 A g <sup>-1</sup> )                                        | 1 M KOH     | 9         |
| MoS <sub>2</sub> @3DGN                                   | 315.6 (1 A g <sup>-1</sup> )                                           | 3 M KOH     | 10        |
| MnS@rGO/Ni-foam                                          | 2220 (0.5 A g <sup>-1</sup> )                                          | 3 M KOH     | 11        |
| NiS <sub>2</sub> @m-g-C <sub>3</sub> N <sub>4</sub> /gra | 296 mAh g <sup>-1</sup> /2500 F g <sup>-1</sup> (1 A g <sup>-1</sup> ) | 2 M KOH     | This work |

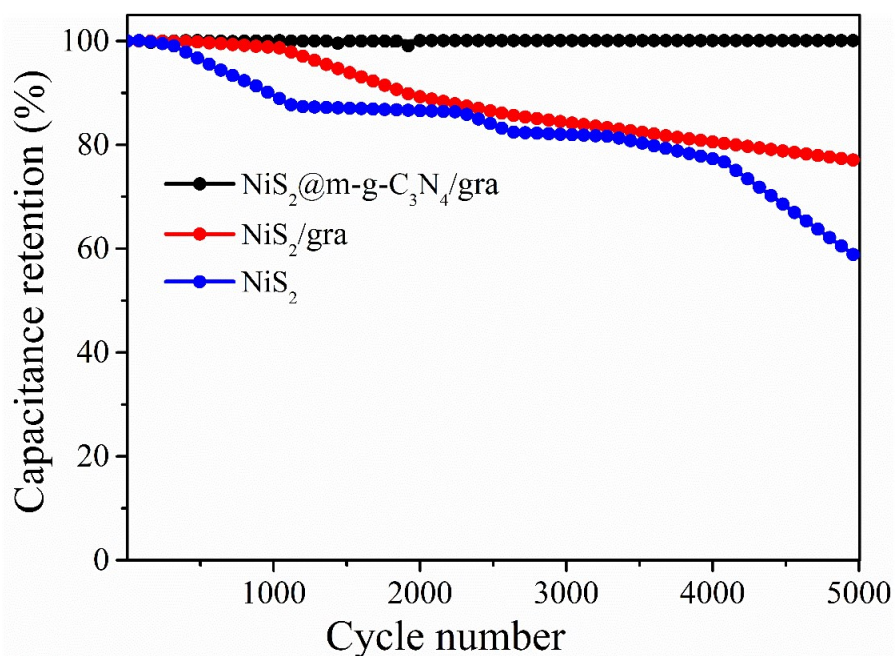

**Figure S9** Cycle performances of NiS<sub>2</sub>@m-g-C<sub>3</sub>N<sub>4</sub>/gra, NiS<sub>2</sub>/gra and NiS<sub>2</sub> electrodes tested at 5 A g<sup>-1</sup>.

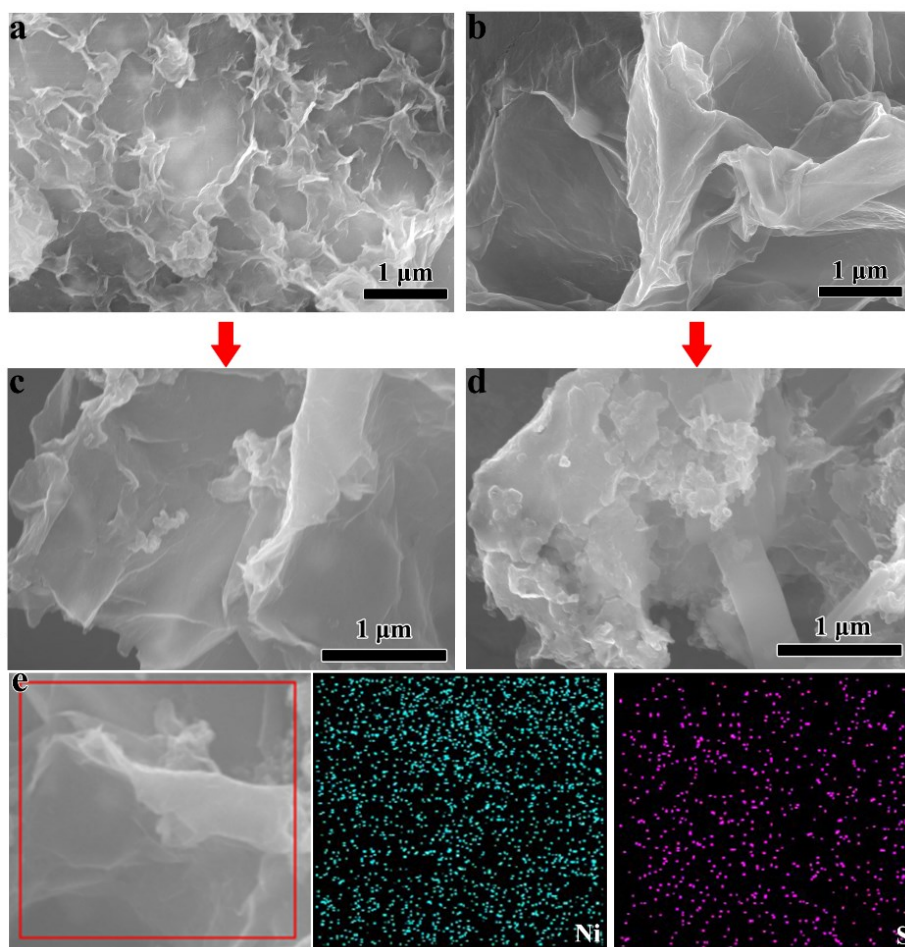

**Figure S10** SEM pictures of NiS<sub>2</sub>@m-g-C<sub>3</sub>N<sub>4</sub>/gra electrode before (a) and after cycling test (c), SEM pictures of NiS<sub>2</sub>/gra electrode before (b) and after cycling test (d), (e) elemental mapping characterizations for Ni and S of NiS<sub>2</sub>@m-g-C<sub>3</sub>N<sub>4</sub>/gra after cycling.

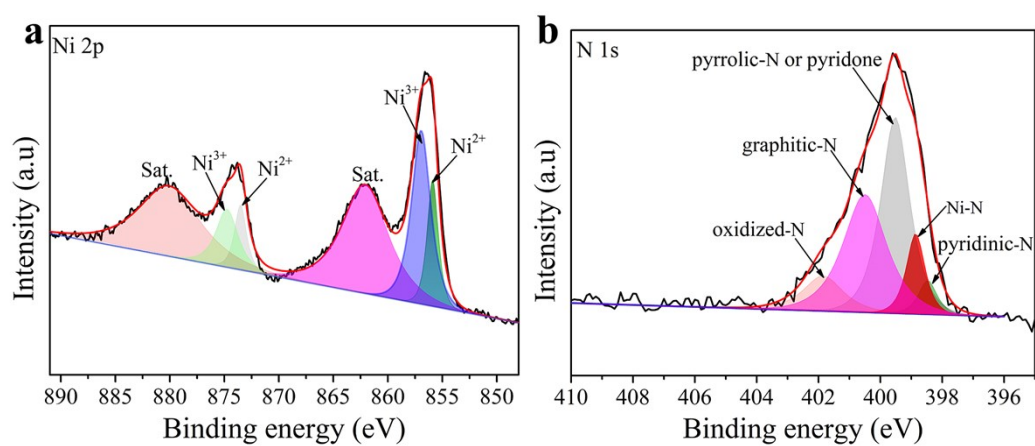

**Figure S11** XPS spectrum of Ni 2p (a) and N 1s (b) of NiS<sub>2</sub>@m-g-C<sub>3</sub>N<sub>4</sub>/gra hybrids after cycling test.



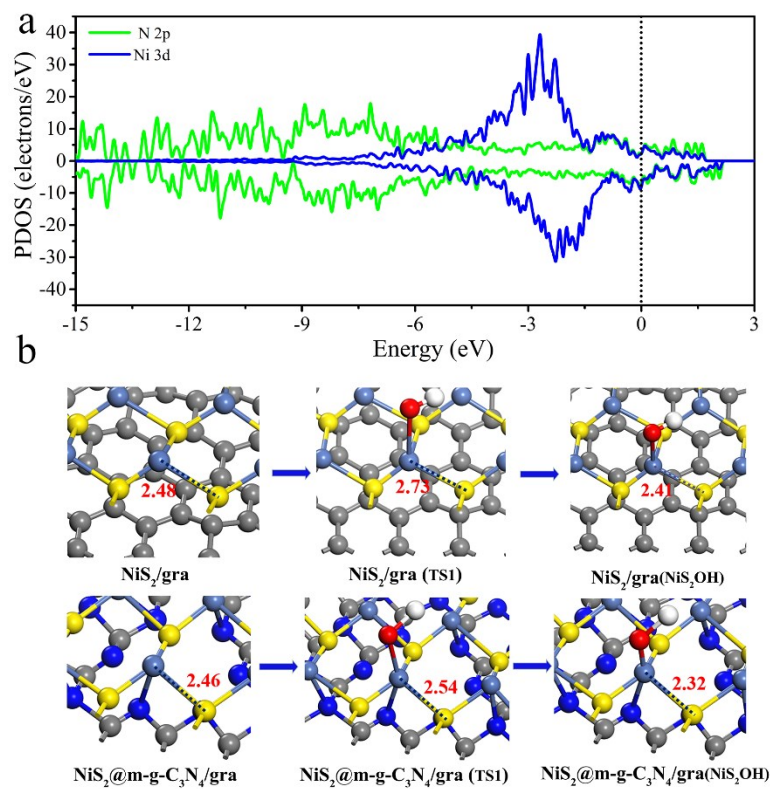

**Figure S12** (a) Partial density of states per eV for the nitrogen 2p orbital and nickel 3d orbital in NiS<sub>2</sub>@m-g-C<sub>3</sub>N<sub>4</sub>/gra, and change in Ni-S bond length (b) of NiS<sub>2</sub>@m-g-C<sub>3</sub>N<sub>4</sub>/gra and NiS<sub>2</sub>/gra during electrochemical reaction.

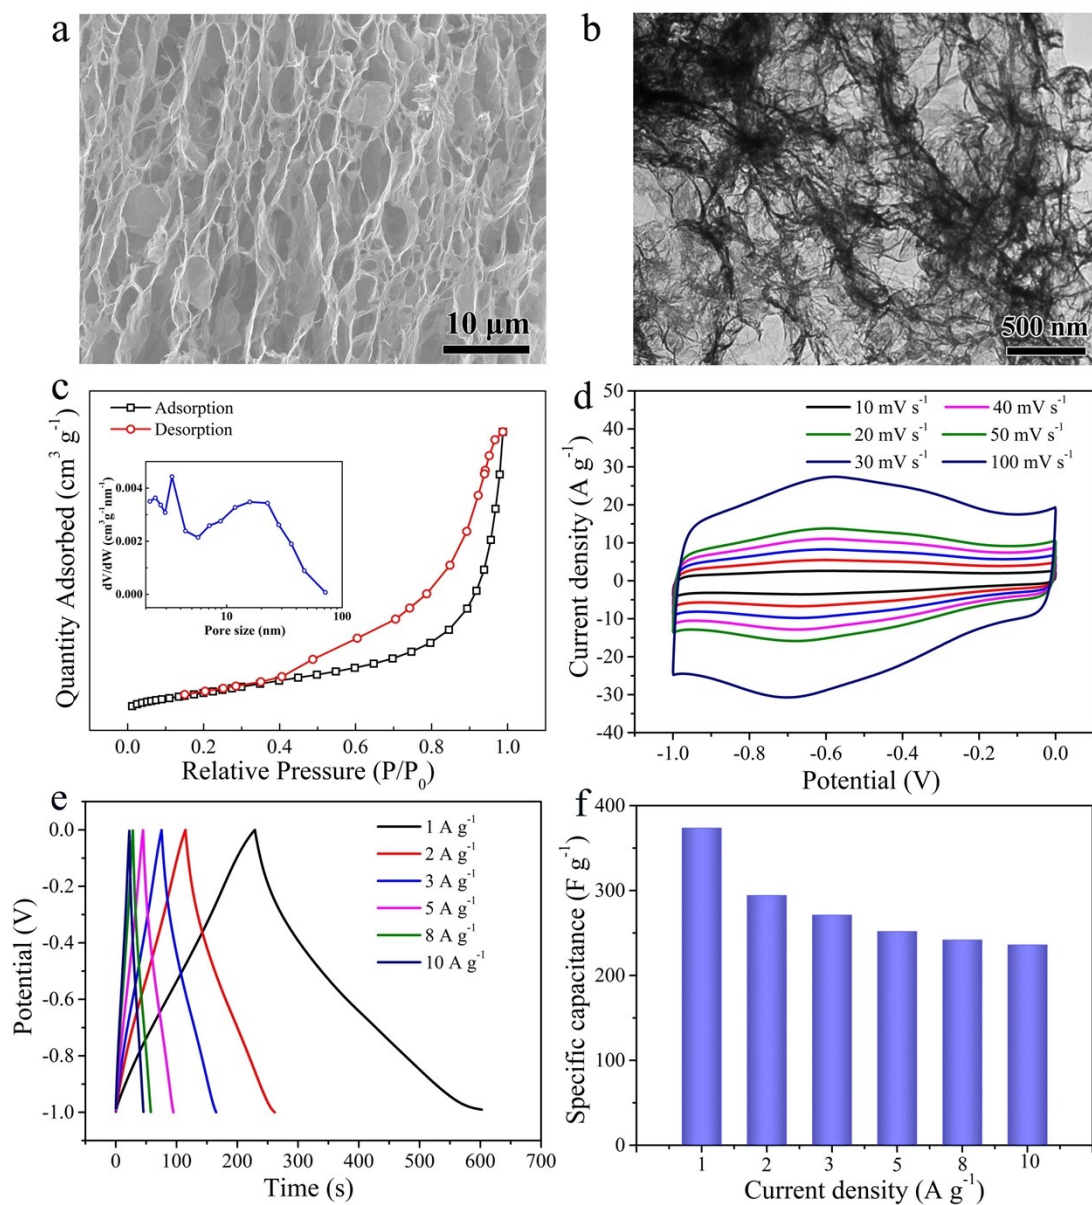

**Figure S13** SEM image (a) and TEM image (b) of g-C<sub>3</sub>N<sub>4</sub>/RGO, N<sub>2</sub> adsorption-desorption isotherms (c) of g-C<sub>3</sub>N<sub>4</sub>/RGO (inset: pore-size distribution), electrochemical performance of CV curves (d) and GCD curves (e) of g-C<sub>3</sub>N<sub>4</sub>/RGO, the specific capacitances (f) of g-C<sub>3</sub>N<sub>4</sub>/RGO at different current densities.

**Table S3** Performance comparison of NiS<sub>2</sub>@m-g-C<sub>3</sub>N<sub>4</sub>/gra//RGO/g-C<sub>3</sub>N<sub>4</sub> and

various HSC devices based on heterostructured hybrids as cathode

| Devices                                                                                        | Energy density (Wh kg <sup>-1</sup> ) | Power density (W kg <sup>-1</sup> ) | Cycle life and capacitance retention | Ref.      |
|------------------------------------------------------------------------------------------------|---------------------------------------|-------------------------------------|--------------------------------------|-----------|
| 0.5 cP/rGO/Co <sub>9</sub> S <sub>8</sub> //AC                                                 | 50.3                                  | 415.8                               | 8000 cycles (96%)                    | 7         |
| Ni <sub>3</sub> S <sub>4</sub> @rGO-20//RGO                                                    | 37.3                                  | 398                                 | 10000 cycles (91.4%)                 | 8         |
| MoS <sub>2</sub> @3DGN //AC                                                                    | 36.43                                 | 400                                 | 4000 cycles (100%)                   | 10        |
| NiS <sub>2</sub> @MoS <sub>2</sub> //AC                                                        | 37.2                                  | 800                                 | 10000 cycles (80.5%)                 | 12        |
| NiMn <sub>2</sub> O <sub>4</sub> @CoS//SCG                                                     | 44.56                                 | 700                                 | 5000 cycles (94.0%)                  | 13        |
| MoS <sub>2</sub> /NiS //AC                                                                     | 38.6                                  | 400                                 | 10000 cycles (100%)                  | 14        |
| NiS <sub>2</sub> @m-g-C <sub>3</sub> N <sub>4</sub> /gra //RGO/g-C <sub>3</sub> N <sub>4</sub> | 63.0                                  | 931.2                               | 10000 cycles (100%)                  | This work |

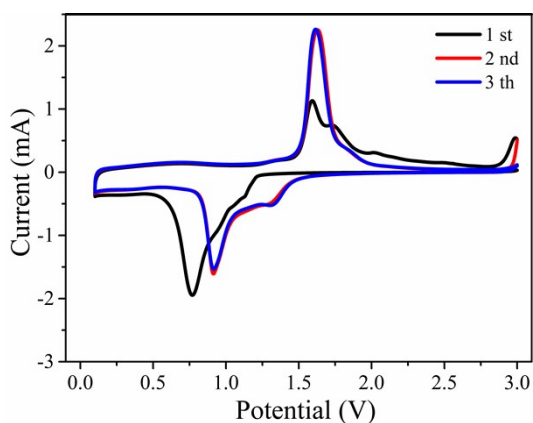

**Figure S14** CV curves the NiS<sub>2</sub>@m-g-C<sub>3</sub>N<sub>4</sub>/gra electrode at a scan rate of 0.5 mV s<sup>-1</sup> with a voltage range of 0.1-3.0 V versus Na<sup>+</sup>/Na.

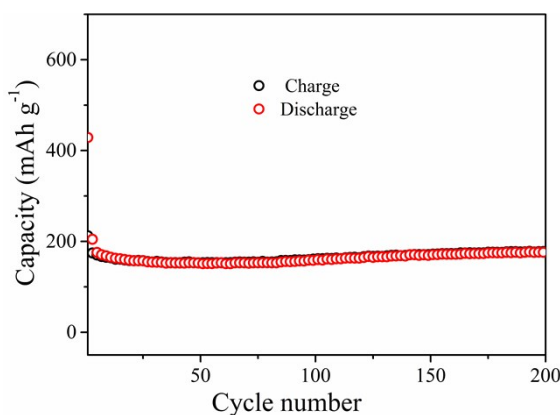

**Figure S15** Cycling performance of m-g-C<sub>3</sub>N<sub>4</sub>/gra at a current density of 0.1 A g<sup>-1</sup>.

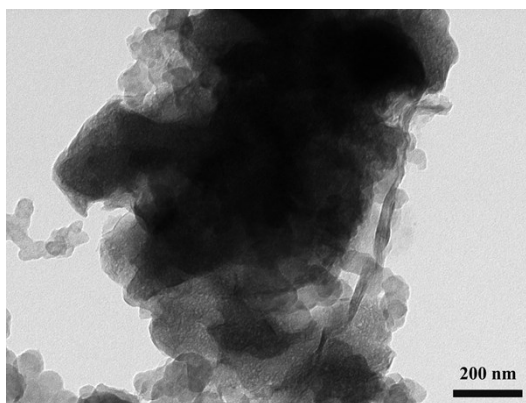

**Figure S16** TEM image of NiS<sub>2</sub>@m-g-C<sub>3</sub>N<sub>4</sub>/gra electrode after SIBs test at 2 A g<sup>-1</sup> for 100 cycles.

## References

1. J. Phiri, L.-S. Johansson, P. Gane and T. Maloney, *Compos. Part. B-Eng.*, 2018, **147**, 104-113.
2. S.-L. Yang, H.-B. Yao, M.-R. Gao and S.-H. Yu, *CrystEngComm*, 2009, **11**, 1383-1390.
3. J. Yang, X. Duan, W. Guo, D. Li, H. Zhang and W. Zheng, *Nano Energy*, 2014, **5**, 74-81.
4. C. Qu, L. Zhang, W. Meng, Z. Liang, B. Zhu, D. Dang, S. Dai, B. Zhao, H. Tabassum, S. Gao, H. Zhang, W. Guo, R. Zhao, X. Huang, M. Liu and R. Zou, *J. Mater. Chem. A*, 2018, **6**, 4003-4012.
5. T. C. Ke, B. Vedhanarayanan, L. D. Shao and T. W. Lin, *ChemElectroChem*, 2019, **6**, 3806-3814.
6. S. Wang, Y. Song, Y. Ma, Z. Zhu, C. Zhao and C. Zhao, *Chem. Eng. J.*, 2019, **365**, 88-98.
7. T. Yao, Y. Li, D. Liu, Y. Gu, S. Qin, X. Guo, H. Guo, Y. Ding, Q. Liu, Q. Chen, J. Li and D. He, *J. Power Sources*, 2018, **379**, 167-173.
8. Q. Hu, X. Zou, Y. Huang, Y. Wei, YaWang, F. Chen, B. Xiang, Q. Wu and W. Li, *J. Colloid Interface Sci.*, 2020, **559**, 115-123.
9. B. Xie, Y. Chen, M. Yu, S. Zhang, L. Lu, Z. Shu and Y. Zhang, *RSC Adv.*, 2016, **6**, 89397-89406.
10. R. Zhou, C.-j. Han and X.-m. Wang, *J. Power Sources*, 2017, **352**, 99-110.
11. P. Naveenkumar and G. Paruthimal Kalaignan, *Electrochim. Acta*, 2018, **289**, 437-447.
12. S. Hou, Y. Lian, Z. Xu, D. Wang, C. Ban, J. Zhao and H. Zhang, *Electrochim. Acta*, 2020, **330**, 135208-135210.
13. N. Hu, L. Huang, W. Gong and P. K. Shen, *ACS Sustain. Chem. Eng.*, 2018, **6**, 16933-16940.
14. Q. Qin, L. Chen, T. Wei and X. Liu, *Small*, 2019, **15**, 1803639-1803613.
